# Supplementary material for: Novel Plant-Protein (Quinoa) Derived Bioactive Peptides with Potential Anti-Hypercholesterolemic Activities: Identification, Characterization and Molecular Docking of Bioactive Peptides
Source: MDPI journal article supplement (doi:10.3390/foods12061327), 2023-03-20
Supplement: s1 [file s1]

**Table S1.** List of peptides identified in chymotrypsin hydrolysed quinoa protein hydrolysate

QC6

| Peptide        | Peptide Ranker score |
|----------------|----------------------|
| AAVHAF         | 0.438779             |
| AGLR           | 0.544331             |
| AHCGGLPY       | 0.689212             |
| ALDSPGSR       | 0.462201             |
| ALSKR          | 0.196289             |
| ANPALAVGY      | 0.455945             |
| ASNLDNPSPEGTVM | 0.521523             |
| AVGVI          | 0.122801             |
| CALVGL         | 0.507875             |
| CDCP           | 0.887083             |
| CVLSPL         | 0.509805             |
| CVSP           | 0.329948             |
| CYTF           | 0.853922             |
| DAVLGV         | 0.128426             |
| DFLM           | 0.915466             |
| DFTF           | 0.920428             |
| DGPVR          | 0.432235             |
| DH             | 0.147981             |
| DVTSPL         | 0.243089             |
| DYAVSF         | 0.375715             |
| EGGPVG         | 0.27601              |
| ELLL           | 0.208407             |
| ESTP           | 0.087021             |
| EVLP           | 0.112021             |
| EVTSGDT        | 0.0412863            |
| FE             | 0.589707             |
| FEVEAPGNPVVM   | 0.36185              |
| FFE            | 0.934729             |
| FSAGGLP        | 0.808746             |
| FTVM           | 0.537171             |
| GAGAI          | 0.365362             |
| GARR           | 0.523569             |
| GCTSR          | 0.289798             |
| GERFAVNPV      | 0.290352             |
| GFVDLLRDDY     | 0.376191             |
| GLFTEDR        | 0.246168             |
| GPLTR          | 0.487858             |
| GSTASSCS       | 0.164599             |
| GVGR           | 0.345362             |

|                  |           |
|------------------|-----------|
| GVLVG            | 0.16568   |
| HD               | 0.128192  |
| HDSF             | 0.573106  |
| HLAR             | 0.243625  |
| HMLH             | 0.509564  |
| HMPALTEIFGDDSVL  | 0.262311  |
| HR               | 0.331511  |
| HSHVH            | 0.133601  |
| HVAF             | 0.448191  |
| HVASGAGPW        | 0.543078  |
| HVQGHPALPGVPAHW  | 0.555346  |
| KEAPAL           | 0.224453  |
| KGDCHPTH         | 0.441731  |
| KIGGIGTVPVGRVE   | 0.177007  |
| KIVLDSDDPLFGGF   | 0.706601  |
| KLKVDH           | 0.0722252 |
| KPGGTAGSALPRPAHW | 0.608191  |
| KR               | 0.213072  |
| KTPAL            | 0.267865  |
| KTTLAK           | 0.0544679 |
| LADSPH           | 0.261273  |
| LDLP             | 0.484448  |
| LKFT             | 0.368847  |
| LLPYH            | 0.533626  |
| LLTGVL           | 0.190991  |
| LLVG             | 0.236174  |
| LPLLR            | 0.613775  |
| LR               | 0.569984  |
| LRL              | 0.564172  |
| LV               | 0.0991475 |
| LVDLR            | 0.195511  |
| LVGGTGEEGEAL     | 0.101911  |
| LVPPK            | 0.33989   |
| LYLLLARSM        | 0.345476  |
| LYNDWDLR         | 0.679917  |
| LYVTVPMHLVVM     | 0.267707  |
| ME               | 0.198233  |
| MFVPVPH          | 0.55808   |
| ML               | 0.894564  |
| MLLALAGNQPL      | 0.381893  |
| MLLL             | 0.756994  |
| MNAGV            | 0.220838  |
| MNAR             | 0.374396  |
| MPQGT            | 0.494047  |
| MSSL             | 0.414735  |

|                         |           |
|-------------------------|-----------|
| MTTSPK                  | 0.11994   |
| MVLP                    | 0.52787   |
| MYLY                    | 0.748653  |
| NLSKLL                  | 0.36374   |
| NRGT                    | 0.209343  |
| PEPTIDE                 | 0.111635  |
| PGGAR                   | 0.640441  |
| PSSKR                   | 0.245177  |
| PYTTQSP                 | 0.129124  |
| QGVLEGVELCR             | 0.321682  |
| QHPHGLGALCAAPPST        | 0.720324  |
| QKSPNVTGLTPVL           | 0.409057  |
| QLNAH                   | 0.159603  |
| QLSPAVPPAET             | 0.292052  |
| RAGR                    | 0.417105  |
| RFTWVT                  | 0.469549  |
| RGEFAVFY                | 0.455717  |
| RLEDLRIPVAY             | 0.192841  |
| RR                      | 0.565498  |
| RSQTGKADPT              | 0.0910118 |
| SELLK                   | 0.131421  |
| SGPAR                   | 0.632577  |
| SPLEAGR                 | 0.349217  |
| SVGMDAVFY               | 0.464034  |
| TAAPR                   | 0.226615  |
| TAEKDEST                | 0.0334789 |
| TDGLTSLDRY              | 0.131845  |
| TELP                    | 0.111454  |
| TFVLPPTLN               | 0.179309  |
| TGATVLCAPRKN            | 0.243014  |
| THTLLLLP                | 0.276065  |
| TLPEDLTAP               | 0.127875  |
| TLPGR                   | 0.413895  |
| TREVVPGMIVTGMEVAEIDGAPR | 0.0501995 |
| TTSP                    | 0.0873582 |
| TYVF                    | 0.398271  |
| VAEGH                   | 0.0805037 |
| VPEDLLR                 | 0.395537  |
| VG DPR                  | 0.376834  |
| VGGR                    | 0.389969  |
| VGGV                    | 0.179893  |
| VLA SEG GPGL            | 0.340721  |
| VLGT                    | 0.120896  |
| VLLPR                   | 0.333531  |
| VPISGFEGDNMIER          | 0.461132  |

|                    |           |
|--------------------|-----------|
| VPISGFEGDNMIERSTNL | 0.322682  |
| VSAP               | 0.171359  |
| VSVAH              | 0.0687475 |
| VTVH               | 0.0362087 |
| VYML               | 0.567064  |
| WEGTSVVNP          | 0.122929  |
| YATL               | 0.237529  |

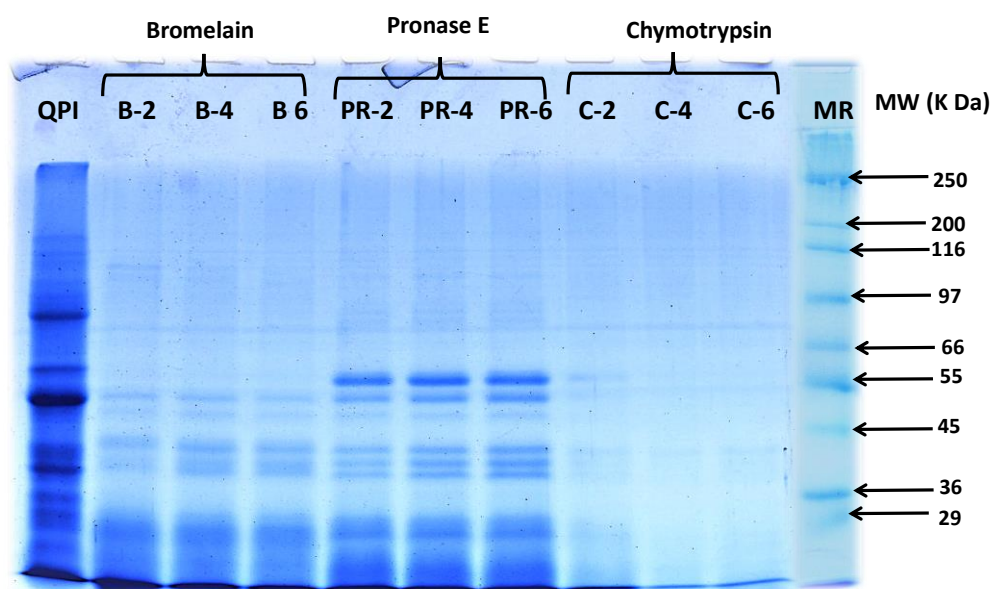

**Figure S1.** Electrophoretic patterns of quinoa proteins and quinoa protein hydrolysates.

Keynotes: B-2, B-4, B6, PR-2, PR-4, PR-6 and C-2, C-4 and C-6 represents Bromelain, Pronase E and Chymotrypsin generated hydrolysates after 2, 4 and 6 h of hydrolysis, MR: wide range protein marker, K Da: Kilo Dalton. **Source:** Mudgil et al. (2020) with permission to reproduce figure obtained from Elsevier via License no: 5487580410082)
